# Supplementary material
Source: PubMed Central journal article supplement (PMC6910649)

**Figure S1 | A depiction of the data from Figure 1 showing all data points.** Sample sizes are shown on a log scale. See <https://osf.io/spr9a/> for data and code.

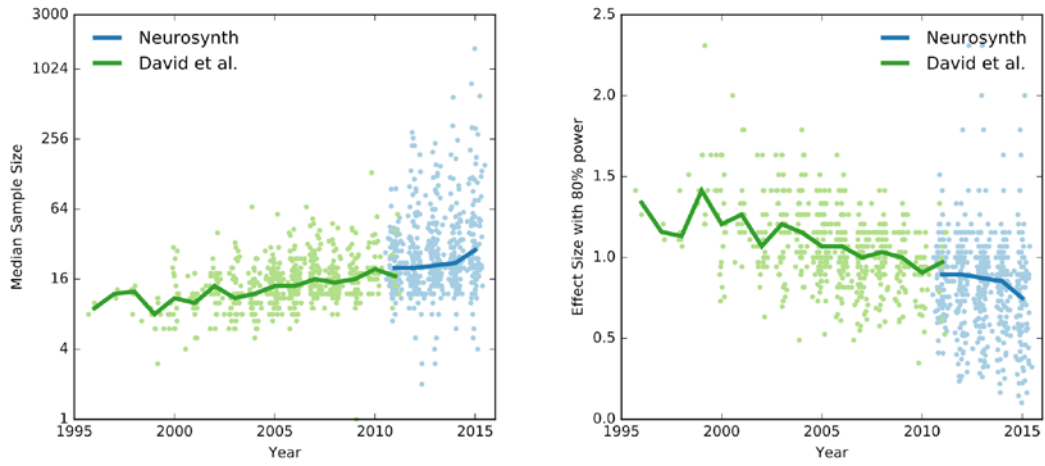

Supplement: NIHMS1060257-supplement-S1.pdf [file NIHMS1060257-supplement-S1.pdf]
